# Supplementary material for: Can fused-pyrrole rings act as better π-spacer units than fused-thiophene in dye-sensitized solar cells? A computational study
Source: Royal Society of Chemistry journal article supplement (doi:10.1039/c6nj02040b), 2016-01-01
Supplement: c6nj02040b1.pdf [file c6nj02040b1.pdf]

## Can fused-pyrrole rings act as better $\pi$ -Spacer units than fused-thiophene in dye-sensitized solar cells? A computational study

Abul Kalam Biswas <sup>a</sup>, Amitava Das <sup>a\*</sup> and Bishwajit Ganguly <sup>a\*</sup>

*Analytical Discipline and Centralized Instrument Facility, Academy of Scientific and  
Innovative Research, CSIR–Central Salt and Marine Chemicals Research Institute, Bhavnagar–  
364002, India.*

\*Email:– [ganguly@csmcri.org](mailto:ganguly@csmcri.org) (BG), [a.das@csmcri.org](mailto:a.das@csmcri.org) (AD)

### Supporting Information:

**Table S1:** The calculated atomic charge distribution with NBO 3.1 (in e) of the  $(\text{TiO}_2)_{10}$  of **1-**  
 **$(\text{TiO}_2)_{10}$**  and **3-** **$(\text{TiO}_2)_{10}$**  and dipole moment ( $\mu_{\text{normal}}$ ).

| $S_0$    |                       | $S_1$                 |                       |            |
|----------|-----------------------|-----------------------|-----------------------|------------|
| Dyes     | $(\text{TiO}_2)_{10}$ | $\mu_{\text{normal}}$ | $(\text{TiO}_2)_{10}$ | $\Delta q$ |
| <b>1</b> | 0.373                 | 8.54                  | 0.256                 | 0.117      |
| <b>3</b> | 0.307                 | 12.94                 | -0.588                | 0.895      |

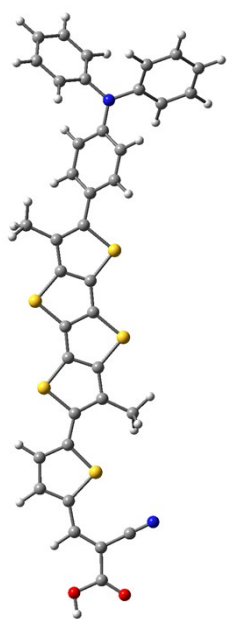

dye 1

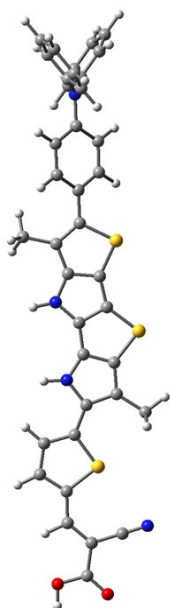

dye 2

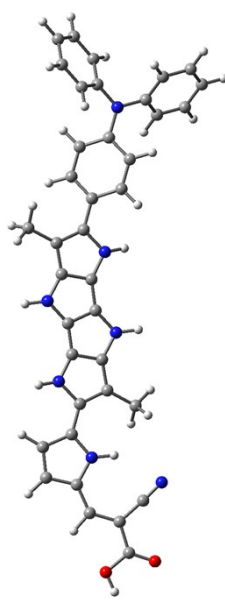

dye 3

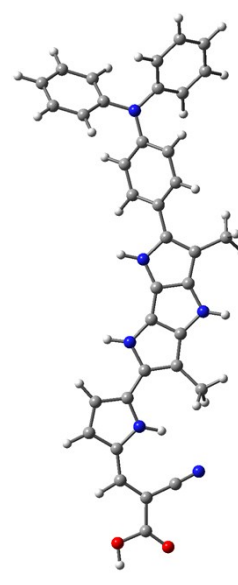

dye 4

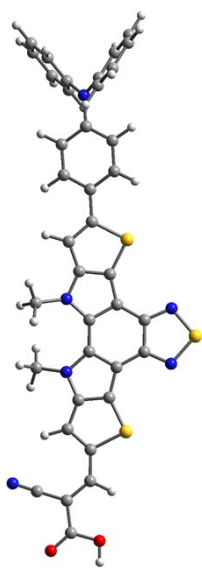

dye 5

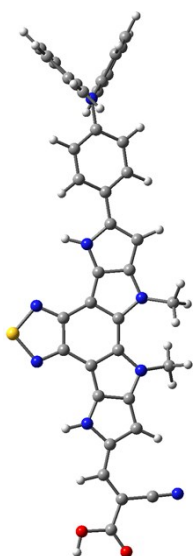

dye 6

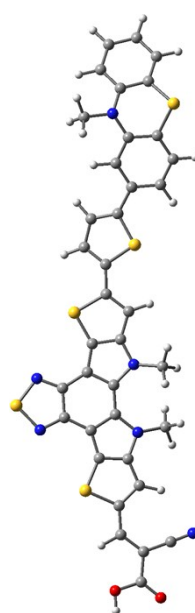

dye 7

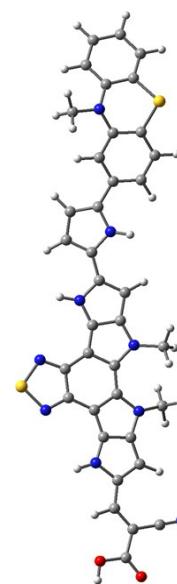

dye 8

**Figure S2:** Most stable optimized structures of the dyes 1-8.
